# Supplementary material for: The effect of light on N 2 fixation and net nitrogen release of field Trichodesmium
Source: Copernicus journal article supplement (doi:10.5194/bg-2017-198), 2017-06-20
Supplement: Supplementary file 1 [file bg-2017-198-supplement.pdf]

# The effect of light on N<sub>2</sub> fixation and net nitrogen release of field

## *Trichodesmium*

Yangyang Lu<sup>1,2</sup>, Zuozhu Wen<sup>1,3</sup>, Dalin Shi<sup>1,3</sup>, Mingming Chen<sup>1,2</sup>, Yao Zhang<sup>1,2</sup>, Sophie Bonnet<sup>4</sup>,  
Yuhang Li<sup>5</sup>, Jiwei Tian<sup>6</sup> and Shuh-Ji Kao<sup>1,2\*</sup>

5

<sup>1</sup>State Key Laboratory of Marine Environmental Science, Xiamen University, Xiamen, China

<sup>2</sup>College of Ocean and Earth Sciences, Xiamen University, Xiamen, China

<sup>3</sup>College of Environment and Ecology, Xiamen University, Xiamen, China

<sup>4</sup>IRD, Aix Marseille Université, CNRS/INSU, Université de Toulon, Mediterranean Institute of Oceanography (MIO), New

10 Caledonia, France

<sup>5</sup>Institute of Oceanology, Chinese Academy of Sciences, Qingdao, China

<sup>6</sup>Physical Oceanography Laboratory, Ocean University of China, Qingdao, China, Qingdao China

\*Correspondence to: [sjkao@xmu.edu.cn](mailto:sjkao@xmu.edu.cn)

Supplementary Information

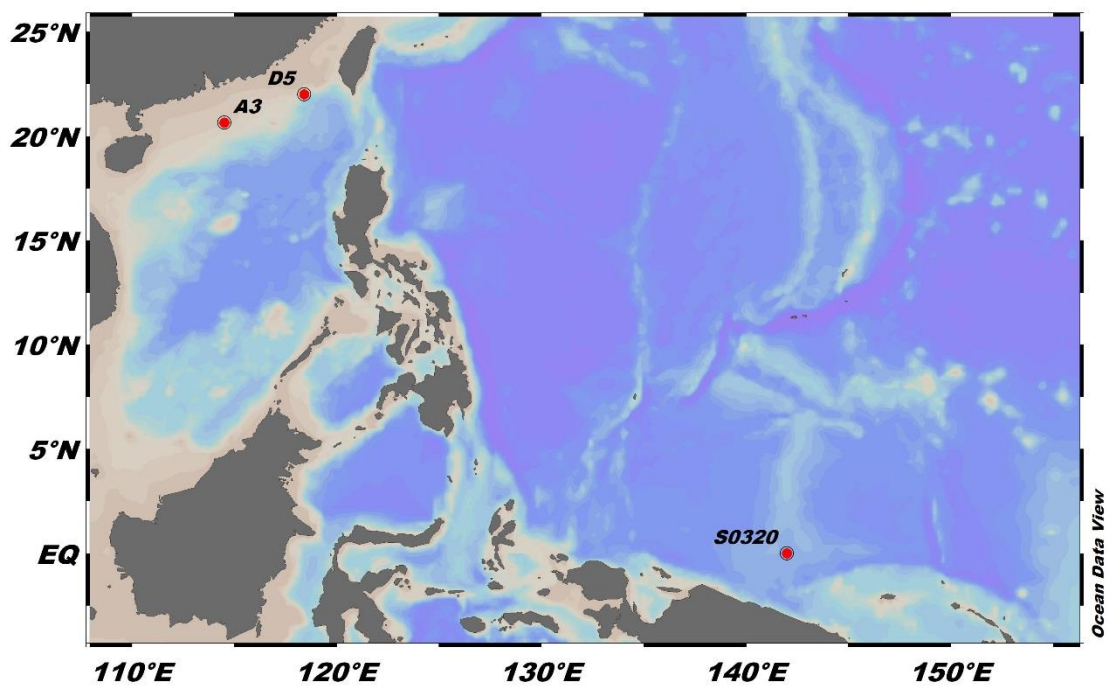

Figure 1. Sampling locations in the Western Pacific Ocean and the South China Sea

Table 1. Synthesis of PON/POC and DON isotopic value before and after 24h incubations at station S0320. Where the '<10  $\mu\text{m-a}$ ' represent NF rate of <10  $\mu\text{m}$  community incubated with > 10  $\mu\text{m}$  *Trichodesmium* colonies, '<10 $\mu\text{m-b}$ ' represent the background NF rate of <10  $\mu\text{m}$  community.

5

| irradiance<br>( $\mu\text{E m}^{-2} \text{s}^{-1}$ ) | PON $\delta^{15}\text{N}$<br>(‰) | DON $\delta^{15}\text{N}$<br>(‰) | POC $\delta^{13}\text{C}$<br>(‰) |
|------------------------------------------------------|----------------------------------|----------------------------------|----------------------------------|
| Initial condition                                    | -0.6 (0.1)                       | 3.0 (0.4)                        | -18.1 (0.1)                      |
| 2010                                                 | 4050 (372)                       | 78.8 (3.0)                       | 708 (11.2)                       |
| 2010 (<10 $\mu\text{m-a}$ )                          | 1092 (215)                       | -                                | 191(14.6)                        |
| 2010 (<10 $\mu\text{m-b}$ )                          | 314 (32.3)                       | -                                | -                                |
| 1180                                                 | 4621 (375)                       | 115 (14.7)                       | 692 (19.7)                       |
| 612                                                  | 4121 (352)                       | 132 (18.6)                       | 604 (1.7)                        |
| 315                                                  | 2488 (43.6)                      | 123 (36.2)                       | 440 (17.0)                       |
| 192                                                  | 913 (233)                        | 35 (7.8)                         | 217 (63.7)                       |
| 22                                                   | 301 (71.5)                       | 21 (0.9)                         | 93.6 (17.1)                      |

Table 2. Synthesis of PON and DON concentration, isotope value before and after 24h incubations at different light intensity and corresponding NF in station D5.

| Incubation irradiance<br>( $\mu\text{E m}^{-2} \text{ s}^{-1}$ ) | PON $\delta^{15}\text{N}$<br>(‰) | Particulate NF rate<br>( $\text{nM L}^{-1} \text{ d}^{-1}$ ) | DON $\delta^{15}\text{N}$<br>(‰) | Dissolved NF rate<br>( $\text{nM L}^{-1} \text{ d}^{-1}$ ) |
|------------------------------------------------------------------|----------------------------------|--------------------------------------------------------------|----------------------------------|------------------------------------------------------------|
| Initial condition                                                | 2.0 (0.1)                        | -                                                            | 5.8 (0.2)                        | -                                                          |
| 1104                                                             | 234 (1.1)                        | 9.9 (0.4)                                                    | 6.7 (0.7)                        | 0.65 (0.65)                                                |
| 2010 (<10 $\mu\text{m}$ -a)                                      | 28.6 (5.7)                       | 1.0 (0.3)                                                    | -                                | -                                                          |
| 2010 (<10 $\mu\text{m}$ -b)                                      | 15.0 (3.5)                       | 0.5 (0.1)                                                    | -                                | -                                                          |
| 648                                                              | 229 (9.2)                        | 10.1 (1.1)                                                   | 7.2 (0.2)                        | 1.01 (0.11)                                                |
| 336                                                              | 132 (34)                         | 5.7 (1.5)                                                    | 6.8 (0.3)                        | 0.74 (0.26)                                                |
| 173                                                              | 72.8 (7.7)                       | 2.9 (0.2)                                                    | 7.1 (0.4)                        | 0.98 (0.31)                                                |
| 106                                                              | 26.8 (6.3)                       | 1.0 (0.3)                                                    | 7.0 (0.4)                        | 0.86 (0.29)                                                |
| 12                                                               | 21.9 (7.1)                       | 0.9 (0.3)                                                    | 6.7 (0.2)                        | 0.68 (0.18)                                                |

Table 3. Synthesis of PON and DON concentration, isotope value before and after 24h incubations at different light intensity and corresponding NF in station A3.

| Incubation irradiance<br>( $\mu\text{E m}^{-2} \text{ s}^{-1}$ ) | PON $\delta^{15}\text{N}$<br>(‰) | Particulate NF rate<br>( $\text{nM L}^{-1} \text{ d}^{-1}$ ) | DON $\delta^{15}\text{N}$<br>(‰) | Dissolved NF rate<br>( $\text{nM L}^{-1} \text{ d}^{-1}$ ) |
|------------------------------------------------------------------|----------------------------------|--------------------------------------------------------------|----------------------------------|------------------------------------------------------------|
| Initial condition                                                | 2.3 (0.1)                        | -                                                            | 1.2 (0.5)                        | -                                                          |
| 2024                                                             | 320 (57.5)                       | 12.2 (1.8)                                                   | 4.2 (2.3)                        | 1.9 (1.5)                                                  |
| 2010 (<10 $\mu\text{m}$ -a)                                      | 38.2 (11.5)                      | 1.9 (0.3)                                                    | -                                | -                                                          |
| 2010 (<10 $\mu\text{m}$ -b)                                      | 24.3 (5.9)                       | 1.2 (0.4)                                                    | -                                | -                                                          |
| 1188                                                             | 465 (99.2)                       | 19.6 (7.2)                                                   | 7.3 (2.0)                        | 3.1 (0.7)                                                  |
| 616                                                              | 452 (72.9)                       | 17.4 (4.6)                                                   | 8.2 (3.2)                        | 5.0 (1.6)                                                  |
| 317                                                              | 258 (53.0)                       | 9.9 (2.4)                                                    | 7.6 (1.8)                        | 4.5 (1.4)                                                  |
| 194                                                              | 162 (49.4)                       | 7.1 (3.4)                                                    | 8.6 (1.1)                        | 4.0 (1.0)                                                  |
| 22                                                               | 135 (51)                         | 5.3 (2.0)                                                    | 7.0 (1.1)                        | 4.2 (0.02)                                                 |

Table 4. Recalculate the <10 $\mu\text{m}$  fraction (non-diazotrophic phytoplankton) CF rate by Eq. (1) based on  $N_m = 0.28 \pm 0.03 \mu\text{M}$   $\text{L}^{-1} \text{d}^{-1}$ ,  $I_k = 50 \mu\text{E m}^{-2} \text{s}^{-1}$ ,  $N_d = 0.05 \mu\text{M L}^{-1} \text{d}^{-1}$ , then get >10 $\mu\text{m}$  fraction (*Trichodesmium*) CF rate and corresponding *Trichodesmium* CF/NF at different light intensity in station S0320.

5

| Incubation irradiance<br>( $\mu\text{E m}^{-2} \text{s}^{-1}$ ) | < 10 $\mu\text{m}$ fraction CF rate<br>( $\mu\text{M L}^{-1} \text{d}^{-1}$ ) | >10 $\mu\text{m}$ fraction ( <i>Trichodesmium</i> ) CF rate<br>( $\mu\text{M L}^{-1} \text{d}^{-1}$ ) | <i>Trichodesmium</i><br>CF/NF |
|-----------------------------------------------------------------|-------------------------------------------------------------------------------|-------------------------------------------------------------------------------------------------------|-------------------------------|
| 2010                                                            | 0.33 (0.06)                                                                   | 3.3 (0.2)                                                                                             | 8.4 (0.9)                     |
| 1180                                                            | 0.33 (0.06)                                                                   | 3.0 (0.1)                                                                                             | 7.0 (0.6)                     |
| 612                                                             | 0.33 (0.06)                                                                   | 2.6 (0.08)                                                                                            | 6.6 (0.5)                     |
| 315                                                             | 0.33 (0.06)                                                                   | 1.7 (0.07)                                                                                            | 7.2 (0.5)                     |
| 192                                                             | 0.32 (0.06)                                                                   | 0.66 (0.26)                                                                                           | 7.6 (1.3)                     |
| 22                                                              | 0.15 (0.06)                                                                   | 0.29 (0.08)                                                                                           | 10.9 (1.8)                    |

Table 5. Recalculate the <10 $\mu\text{m}$  fraction (non-diazotrophic phytoplankton) CF rate by Eq. (1) based on  $N_m = 0.28 \pm 0.03 \mu\text{M L}^{-1} \text{ d}^{-1}$ ,  $I_k = 120 \mu\text{E m}^{-2} \text{ s}^{-1}$ ,  $N_d = 0.05 \mu\text{M L}^{-1} \text{ d}^{-1}$ , then get >10 $\mu\text{m}$  fraction (*Trichodesmium*) CF rate and corresponding *Trichodesmium* CF/NF at different light intensity in station S0320.

5 Although we did not perform size fractionated incubations at various light intensities, we may evaluate the contribution from non-diazotrophic phytoplankton to the observed variation pattern. According to previous study, the CF ratio non-

| Incubation irradiance<br>( $\mu\text{E m}^{-2} \text{ s}^{-1}$ ) | < 10 $\mu\text{m}$ fraction CF rate<br>( $\mu\text{M L}^{-1} \text{ d}^{-1}$ ) | >10 $\mu\text{m}$ fraction ( <i>Trichodesmium</i> ) CF rate<br>( $\mu\text{M L}^{-1} \text{ d}^{-1}$ ) | <i>Trichodesmium</i> CF/NF |
|------------------------------------------------------------------|--------------------------------------------------------------------------------|--------------------------------------------------------------------------------------------------------|----------------------------|
| 2010                                                             | 0.33 (0.06)                                                                    | 3.3 (0.2)                                                                                              | 8.4 (0.9)                  |
| 1180                                                             | 0.33 (0.06)                                                                    | 3.0 (0.1)                                                                                              | 7.0 (0.6)                  |
| 612                                                              | 0.33 (0.06)                                                                    | 2.6 (0.08)                                                                                             | 6.6 (0.5)                  |
| 315                                                              | 0.31 (0.06)                                                                    | 1.7 (0.07)                                                                                             | 7.3 (0.5)                  |
| 192                                                              | 0.27 (0.06)                                                                    | 0.71 (0.26)                                                                                            | 8.2 (1.1)                  |
| 22                                                               | 0.10 (0.06)                                                                    | 0.34 (0.08)                                                                                            | 13 (2.2)                   |

diazotrophic would increase during low light condition (Harris 1980) due to its lower  $I_k$  value ( $50\text{-}120 \mu\text{E m}^{-2} \text{ s}^{-1}$ ) relative to the apparent  $I_k$  value ( $455 \mu\text{E m}^{-2} \text{ s}^{-1}$ ) for this station. Since we have the CF rate of <10 $\mu\text{m}$  fraction ( $0.28 \pm 0.03 \mu\text{M L}^{-1} \text{ d}^{-1}$ ) for surface light, this value of approximate  $N_m$  of non-diazotrophic phytoplankton CF rate. Combined this  $N_m$  with reported  $I_k$  value, the Eq. (1) (simulated PI curve) may allow us to assess the influence of non-diazotrophic phytoplankton (<10 $\mu\text{m}$  fraction) on bulk CF. By assuming the  $I_k$  value for non-diazotrophic phytoplankton CF to be  $50\text{-}120 \mu\text{E m}^{-2} \text{ s}^{-1}$ , we derived the non-diazotrophic phytoplankton CF rate for each light point and assess their interference on the *Trichodesmium* CF:NF ratio variation. Result showed that after eliminating the non-diazotrophic CF the bulk CF:NF ratio would be  $6.6 \pm 0.5$  to  $10.9 \pm 1.8$  ( $I_k = 50 \mu\text{E m}^{-2} \text{ s}^{-1}$ ) and  $6.6 \pm 0.5$  to  $13.0 \pm 2.2$  ( $I_k = 120 \mu\text{E m}^{-2} \text{ s}^{-1}$ ), still increasing significantly when light intensity dropped from 600 to  $20 \mu\text{E m}^{-2} \text{ s}^{-1}$  (table 4-5). Taking into consideration of the high apparent  $I_k$ ,  $I_c$  ( $455 \mu\text{E m}^{-2} \text{ s}^{-1}$  and  $315 \mu\text{E m}^{-2} \text{ s}^{-1}$ ) and high R square (0.92) of fitted light response curve of CF, we postulate the variation of CF rate and POC with different

light intensity mainly reflect the carbon metabolism of *Trichodesmium*. The CF by non-diazaotrophic phytoplankton cannot alter the existing pattern.

### **References**

Harris, G.: The measurement of photosynthesis in natural populations of phytoplankton, in, 129-187, 1980.
